# Supplementary figures and images for: Growth regulation by Dpp: an essential role for Brinker and a non-essential role for graded signaling levels
Source: Oxford University Press journal article supplement (doi:10.1242/dev.025635), 2008-11-21

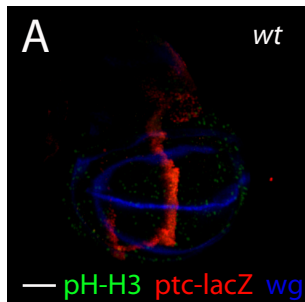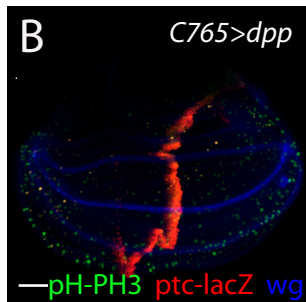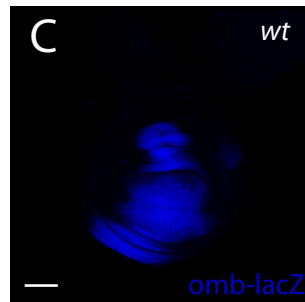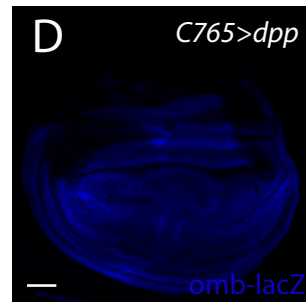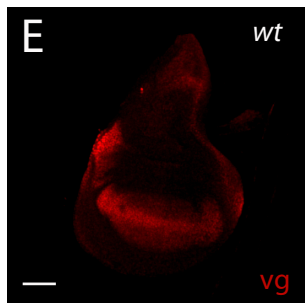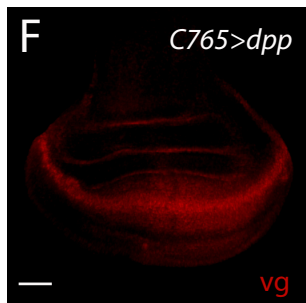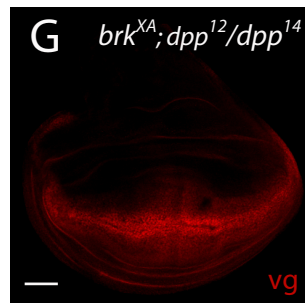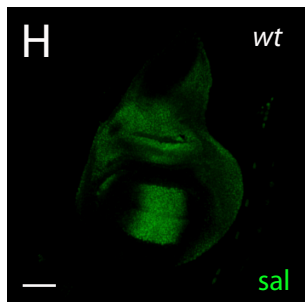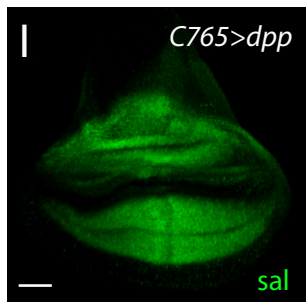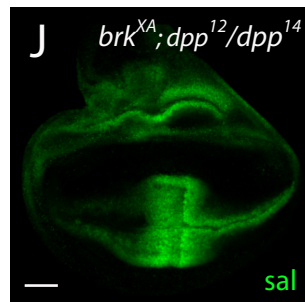

Supplement: dev025635-sup-025635-figs1.pdf [file dev025635-sup-025635-figs1.pdf]

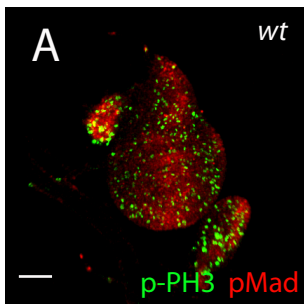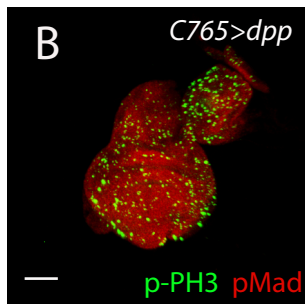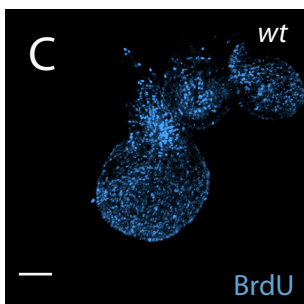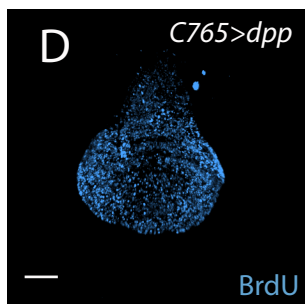

**E**

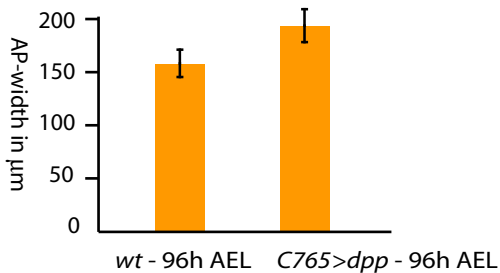

Supplement: dev025635-sup-025635-figs2.pdf [file dev025635-sup-025635-figs2.pdf]

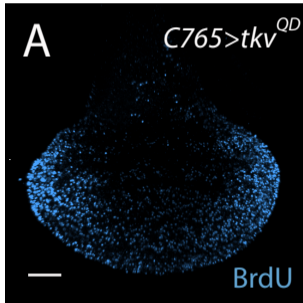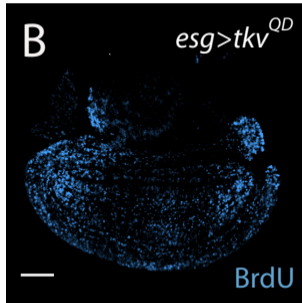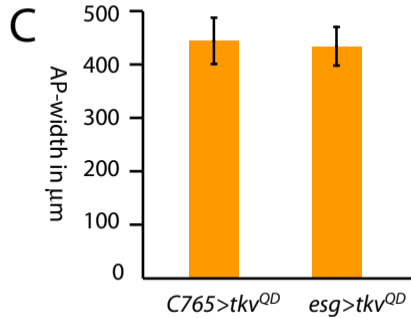

Supplement: dev025635-sup-025635-figs3.pdf [file dev025635-sup-025635-figs3.pdf]

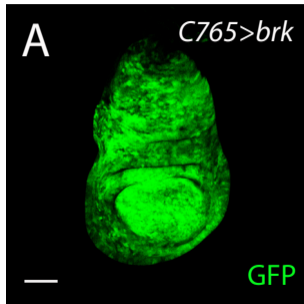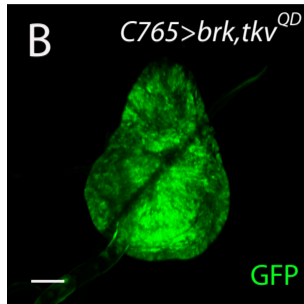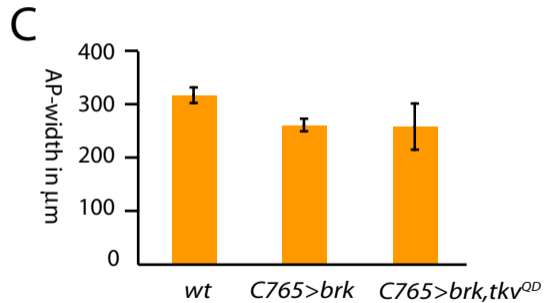

Supplement: dev025635-sup-025635-figs4.pdf [file dev025635-sup-025635-figs4.pdf]

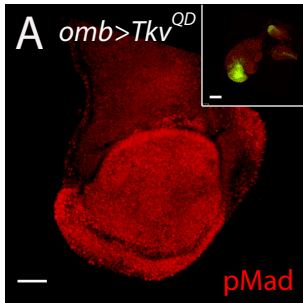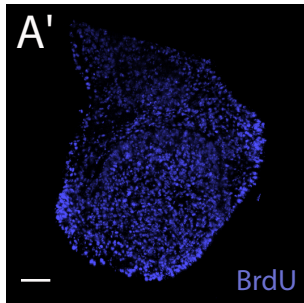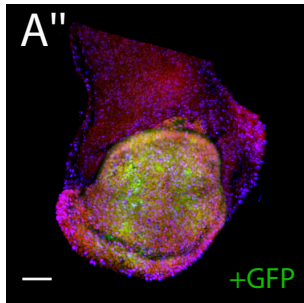

Supplement: dev025635-sup-025635-figs5.pdf [file dev025635-sup-025635-figs5.pdf]
